# Supplementary material
Source: PubMed Central journal article supplement (PMC2664064)
Supplement: 0812590106_0812590106SI.pdf [file 0812590106_0812590106SI.pdf]

# Supporting Information

Ranere et al. 10.1073/pnas.0812590106

## SI Text: Site Descriptions

**El Abra Shelter.** El Abra (18° 24' 15" N, 99° 27' 35" W, 1100 m asl) is a large (40 m wide × 8 m deep) rock shelter with a very high overhang overlooking a season stream valley that leads from the community of Cieneguillas in a southeasterly direction toward the town of Tlaxmalac (Fig. 1). We excavated 11 m<sup>2</sup> of deposits at this site. El Abra was occupied at least as early as 8330–8160 cal years B.P., indicated by a <sup>14</sup>C AMS date of 7400 ± 40 B.P. on charcoal near the base of a 1 × 2-m test unit in front of the shelter (see [supporting information \(SI\) Table S1](#) for all El Abra <sup>14</sup>C dates). Large numbers of chipped stone artifacts (but no handstones or milling stone bases) were recovered in the excavation levels from 90 to 190 cm below ground surface along with calcined bone, charcoal, and rare small sherds (presumably intrusive). Unfortunately, the 4 additional test units (9 m<sup>2</sup>) placed inside the shelter failed to locate additional undisturbed preceramic deposits. The reworking of the shelter deposits in the late 19th and early 20th centuries has left them thoroughly mixed over most of the site. These mixed deposits included chipped stone artifacts (including a point base, see Fig. 4C) and debris similar to those found at Xihuatoxtla, 7 km distant.

**El Abra 2.** The El Abra 2 rock shelter (18° 24' 13" N, 99° 27' 35" W, 1,097 m asl) is located 110 m southwest of El Abra in the same formation (Fig. 1). The site is only half the size of El Abra (20 m in length × 4 m in depth), but it contained dry deposits that were not noticeably disturbed. We excavated 4 m<sup>2</sup> in this site, finding ceramic-aged minimally disturbed deposits to a depth of 110 cm below surface (see [Table S1](#) for <sup>14</sup>C dates). We recovered many plant remains, including a number of maize cobs and a large section of a grass mat.

**Temascalapa Shelter.** We discovered, but were unable to excavate, the Temascalapa Shelter located west of the Iguala Valley (Fig. 1). A large number of artifacts were recovered from the eroded steep dropoff in front of the shelter. The large number of lithics

( $n = 337$ ), the small number of pre-Columbian sherds ( $n = 17$ ) and obsidian artifacts ( $n = 5$ ), and the recovery of 5 spear points all suggest that the occupation of this site is primarily a preceramic one. Over 90% of the lithic materials, tools ( $n = 33$ ) and manufacturing debris alike, consist of red chert. A stemmed, convex base point, 2 convex base lanceolate points, and a preform were all made of red chert (Fig. 4D and F). These points are similar to points recovered in Archaic contexts in other parts of Mexico (1, 2). However, one basal fragment of a biface made of yellow jasper has the cross-section and basal thinning more commonly seen in a late-stage Clovis fluted point preform (Fig. 4G). The recovery of a steep scraper with an engraving spur of brown chalcedony also points toward the possibility of a Paleoindian occupation predating the Archaic occupation of the site with its heavy reliance on red chert for tool manufacturing. Interestingly enough, there were no grinding tools recovered from the slope in front of the Temascalapa Shelter, suggesting a different subsistence focus than the one documented at the Xihuatoxtla Shelter.

**Cueva del Agua.** Cueva del Agua (18° 21' 22" N, 99° 35' 50" W) is a large (34 m wide, 25 m deep, and 3 m in height) solution cavern in the limestone formation of a high ridge rising 1,000 m above the Iguala Valley (Fig. 1). The site is located at 960 m asl or ~200 m above the valley floor. We excavated a 1 × 2-m unit to a depth of 235 cm below surface, ending in disintegrated bedrock. The deposits were all ceramic in age. An AMS <sup>14</sup>C date of 2620 ± 40 B.P. was run on food residues recovered from the inside of a potsherd from the 50- to 60-cm level; the carbon isotopic signature indicated that the residue was most likely that of maize. A second AMS <sup>14</sup>C date of 2530 ± 40 years B.P. was obtained on a canine recovered from the puma burial (see [Table S1](#) for more information on these and other Cueva del Agua dates). The material remains were dominated by sherds ( $n = 735$ ) with only a modest number of lithics ( $n = 32$ ), including 3 obsidian prismatic blades and an obsidian scraper.

1. Faugère B (2006) *Portales Cave: An Archaic Site in Northern Michoacán, México* (original title in Spanish) (Instituto Nacional de Antropología e Historia, Mexico City).

2. Cassiano G (2005) in *Reflections on Lithic Industries* (original title in Spanish), eds González Arratia L, Mirambell L (Instituto Nacional de Antropología e Historia, Mexico City), pp 49–81.

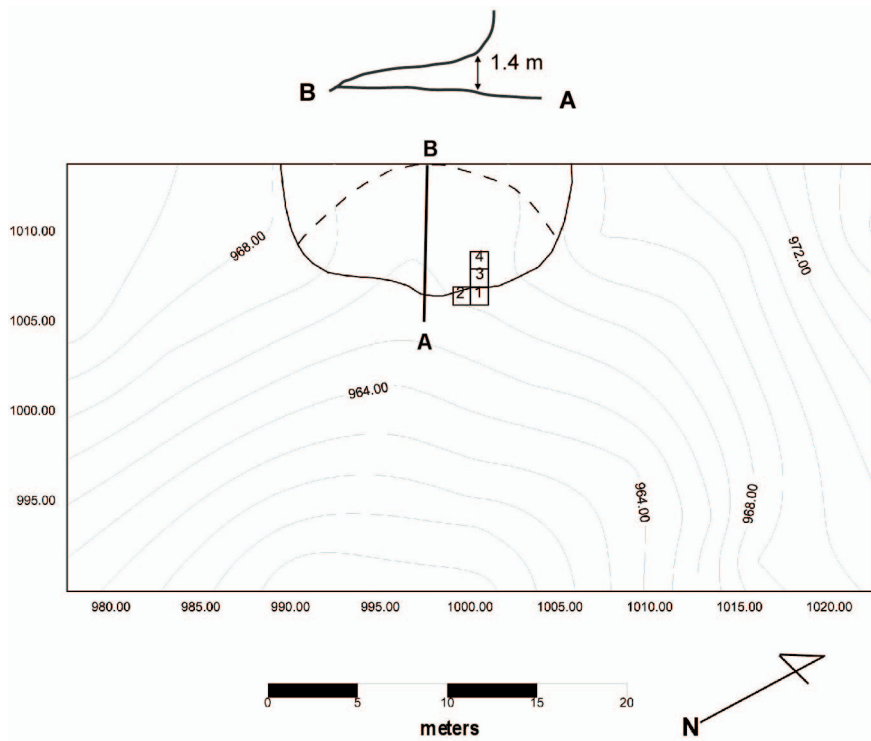

Fig. S1. A planview of the Xihuatoxtla Shelter showing the position of the 1-m<sup>2</sup> excavation units.

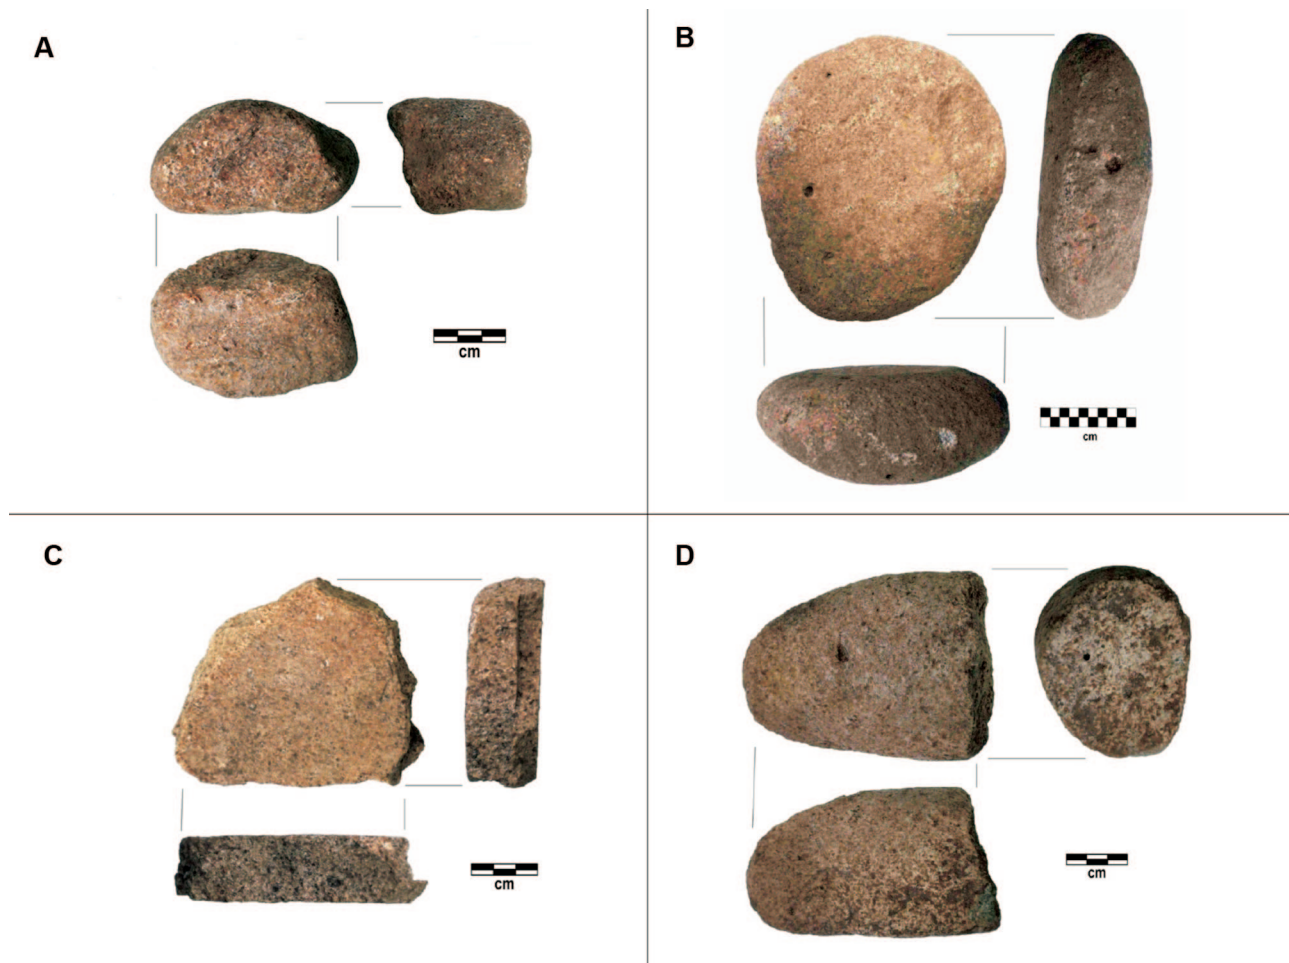

**Fig. S2.** (A) A small handstone (365a) from layer C, yielding 24 maize starch grains and maize cob phytoliths recovered in direct association with a large charcoal fragment that returned a  $^{14}\text{C}$  date of  $4730 \pm 40$  B.P. (B) A complete milling stone base (316d) recovered from layer D that yielded 68 maize starch grains as well as 4 yam (*Dioscorea* sp.), 3 legume, and 1 Marantaceae starch grains. (C) A milling stone base fragment (316c) from layer D that yielded 2 maize starch grains, maize cob phytoliths, and 29 squash phytoliths. (D) A handstone fragment (318d) from layer E that yielded 22 maize starch grains, maize cob phytoliths, and 28 squash phytoliths.

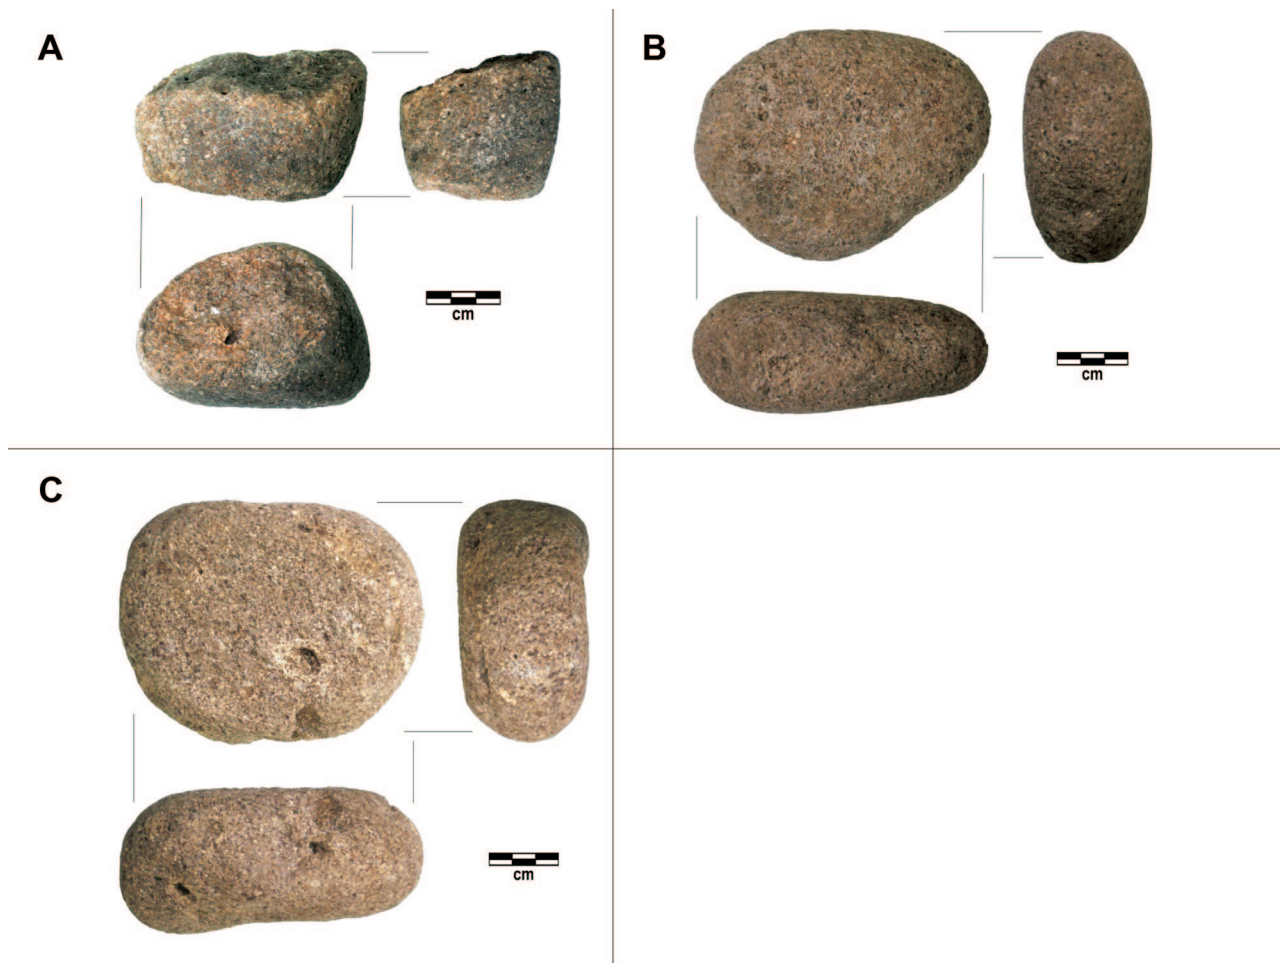

**Fig. S3.** (A) A small handstone fragment (318e) from layer E that yielded 80 maize starch grains as well as maize cob phytoliths and 29 squash phytoliths. (B) A handstone from layer E (319d) that yielded 8 maize starch grains, maize cob phytoliths, and 37 squash phytoliths. (C) A handstone (322c) from the bottom of layer E (85–90 cm below surface) that yielded 11 maize starch grains, maize cob phytoliths, and 7 squash phytoliths.

**Table S1. Radiocarbon dates from Xihuatoxtla, El Abra, El Abra II, and Cueva del Agua**

| Site           | Provenience                 | <sup>14</sup> C age, B.P. | <sup>13</sup> C/ <sup>12</sup> C o/oo | 2 Sigma calibrated age, B.P. | Material dated    | Lab no.     |
|----------------|-----------------------------|---------------------------|---------------------------------------|------------------------------|-------------------|-------------|
| Xihuatoxtla    | Unit 2, layer B 20–30 cm bs | 1200 ± 40                 | −25.3                                 | 1240–1040 and 1030–1000      | Charcoal          | Beta-216366 |
| Xihuatoxtla    | Unit 2, layer B 30–40 cm bs | 2790 ± 40                 | −25.2                                 | 2970–2780                    | Charcoal          | Beta-210893 |
| Xihuatoxtla    | Unit 2, layer C 49 cm bs    | 4730 ± 40                 | −26.2                                 | 5590–5440 and 5410–5320      | Charcoal          | Beta-208115 |
| Xihuatoxtla    | Unit 1, layer D 65 cm bs    | 7920 ± 40                 | −22.7                                 | 8990–8610                    | Charcoal          | Beta-203459 |
| El Abra        | Unit 1, 110–120 cm bs       | 120 ± 40                  | −7.5                                  | 280–0                        | Maize cob         | Beta-210888 |
| El Abra        | Unit 9–10, 150–170 cm bs    | 890 ± 40                  | −26.0                                 | 910–690                      | Charcoal          | Beta 210889 |
| El Abra        | Unit 1–4, 130–140 cm bs     | 1980 ± 40                 | −22.8                                 | 2000–1860                    | Bottle gourd rind | Beta-210891 |
| El Abra        | Unit 1–4, 150–160 cm bs     | 2140 ± 40                 | −20.9                                 | 2310–2240 & 2180–2000        | Bottle gourd rind | Beta-210892 |
| El Abra        | Unit 9–10, 170–190 cm bs    | 7400 ± 40                 | −26.3                                 | 8330–8160                    | Charcoal          | Beta-210890 |
| El Abra II     | Unit 2, 75 cm bs            | 360 ± 40                  | −9.9                                  | 510–310                      | Charred maize cob | Beta-203460 |
| El Abra II     | Unit 1–2, 80–90 cm bs       | 2080 ± 40                 | −10.4                                 | 2140–1940                    | Charred maize cob | Beta-203461 |
| Cueva del Agua | Unit 1–2, 50–60 cm bs       | 2620 ± 40                 | −13.8                                 | 2730–2780                    | Sherd residue     | Beta-180935 |
| Cueva del Agua | Unit 1–2, 78–100 cm bs      | 2530 ± 40                 | −19.0                                 | 2475–2750                    | Puma canine       | Beta-180936 |
| Cueva del Agua | Unit 1–2, 120–130 cm bs     | 2540 ± 40                 | −26.2                                 | 2690–2755 2485–2660          | Charcoal          | Beta-180934 |
| Cueva del Agua | Unit 1–2, 170–180 cm bs     | 3470 ± 40                 | −25.6                                 | 3635–3845                    | Charcoal          | Beta-180937 |
